# Supplementary material
Source: Springer Nature journal article supplement (http://www.nature.com/nchembio/journal/v3/n7/extref/nchembio.2007.3-S6.pdf)
Supplement: nchembio.2007.3-S6.pdf [file nchembio.2007.3-S6.pdf]

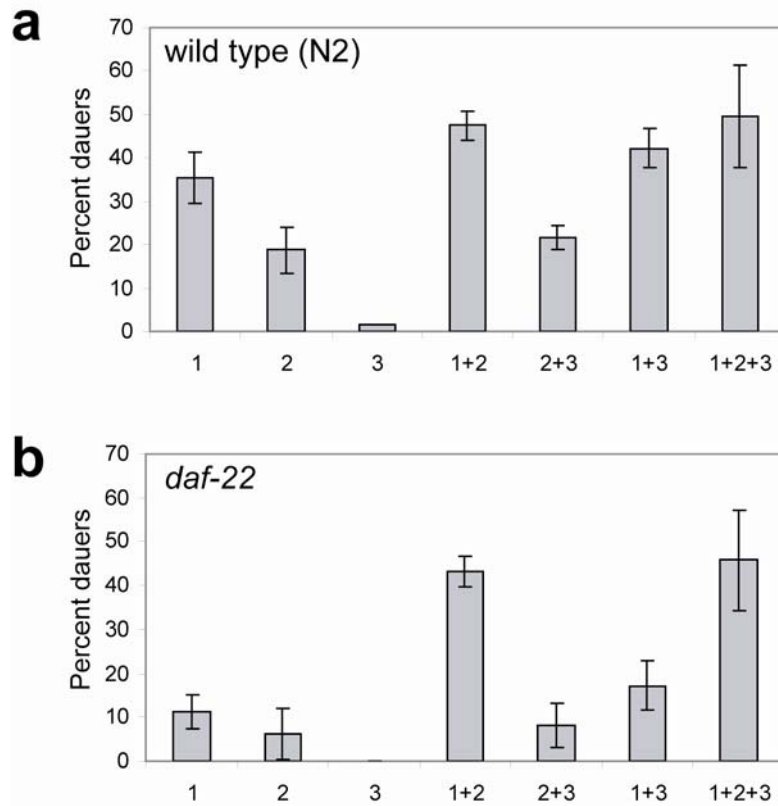

**Supplementary Figure 6** Percent dauer formation in wild-type and *daf-22* worms. **(a)** Percent dauer formation in wild-type (N2) worms induced by 73 nM of **1**, **2**, or **3**, or combinations of two of the ascarosides (each at 73 nM), or combinations of all three ascarosides (each at 73 nM) at 25 °C. Data represent the average of two experiments, and error bars represent  $\pm$  one standard deviation. **(b)** Percent dauer formation in *daf-22* worms induced by 73 nM of **1**, **2**, or **3**, or combinations of two of the ascarosides (each at 73 nM), or combinations of all three ascarosides (each at 73 nM) at 25 °C. Data represent the average of two experiments, and error bars represent  $\pm$  one standard deviation.
